# Supplementary material
Source: Springer Nature journal article supplement (https://www.springermedizin.de/resource/supplementary/12887_2008_222_MOESM6_ESM.pdf/9477548)

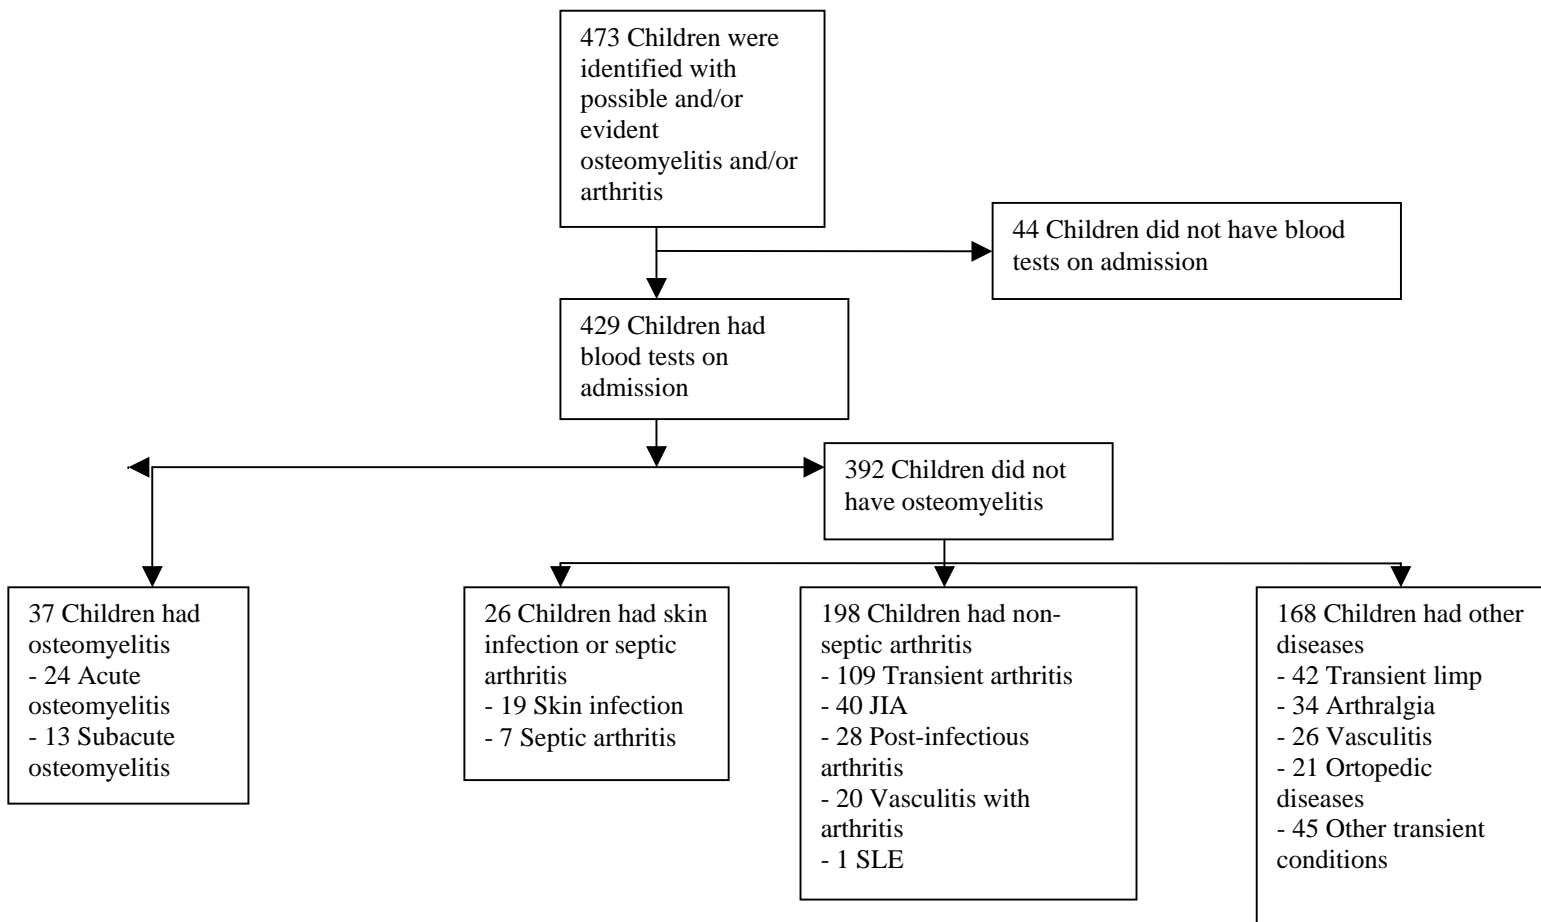

Supplement: MOESM6 [file 9477548]
